# Supplementary material
Source: publisher figshare collection journal article supplement (https://acs.figshare.com/ndownloader/files/22914332)
Supplement: Supplementary file 1 [file 22914332]

# Amorphous Mixtures of Ice and C<sub>60</sub> Fullerene

*Siriney O. Halukeerthi,<sup>a</sup> Jacob J. Shephard,<sup>a,b</sup> Sukhpreet K. Talewar,<sup>a</sup> John S. O. Evans,<sup>b</sup>  
Alexander Rosu-Finsen,<sup>a</sup> Christoph G. Salzmann<sup>a\*</sup>*

<sup>a</sup> Department of Chemistry, University College London, 20 Gordon Street, London WC1H 0AJ,  
United Kingdom; e-mail: c.salzmann@ucl.ac.uk

<sup>b</sup> Department of Chemistry, Durham University, South Road, Durham DH1 3LE, United Kingdom

## Table of Contents

|     |                                                                                                           |    |
|-----|-----------------------------------------------------------------------------------------------------------|----|
| 1.  | Composition of C <sub>60</sub> / H <sub>2</sub> O samples .....                                           | 2  |
| 1.1 | Constant H <sub>2</sub> O flow with varying amounts of C <sub>60</sub> .....                              | 2  |
| 1.2 | Varying the H <sub>2</sub> O flow with constant amounts of C <sub>60</sub> .....                          | 4  |
| 1.3 | Molecular-volume percentages of C <sub>60</sub> in C <sub>60</sub> / H <sub>2</sub> O mixtures .....      | 6  |
| 2.  | Additional X-ray diffraction patterns.....                                                                | 7  |
| 2.1 | Comparison with the XRD pattern of bulk C <sub>60</sub> .....                                             | 7  |
| 2.2 | X-ray diffraction patterns of C <sub>60</sub> / H <sub>2</sub> O mixtures heated from 95 K to 270 K ..... | 8  |
| 2.3 | MCDIFFaX fits of the 150 K diffraction patterns .....                                                     | 9  |
| 2.4 | Intensity of the (110) Bragg peak of ice I as a function of the cubicity .....                            | 9  |
| 3.  | SEM picture of a pure C <sub>60</sub> film deposited at 90 K .....                                        | 10 |
| 4.  | References.....                                                                                           | 10 |

# 1. Composition of C<sub>60</sub> / H<sub>2</sub>O samples

Different molar ratios of H<sub>2</sub>O and C<sub>60</sub> in the C<sub>60</sub> / H<sub>2</sub>O samples were obtained by adjusting the deposition rates of H<sub>2</sub>O and C<sub>60</sub>.

## 1.1 Constant H<sub>2</sub>O flow with varying amounts of C<sub>60</sub>

Firstly, the deposition of H<sub>2</sub>O at 85 K was monitored with a quartz crystal microbalance (QCM). The deposition rate of H<sub>2</sub>O at an inlet pressure of  $1.00 \times 10^{-1}$  mbar was determined to be  $0.85 \mu\text{g cm}^{-2} \text{s}^{-1}$  by performing a linear fit to the data shown in Fig. S1, where the gradient is equal to the mass deposition rate. This deposition rate was divided by the molar mass of H<sub>2</sub>O ( $18.02 \text{ g mol}^{-1}$ ) to give a molar deposition rate of  $4.75 \times 10^{-2} \mu\text{mol cm}^{-2} \text{s}^{-1}$ .

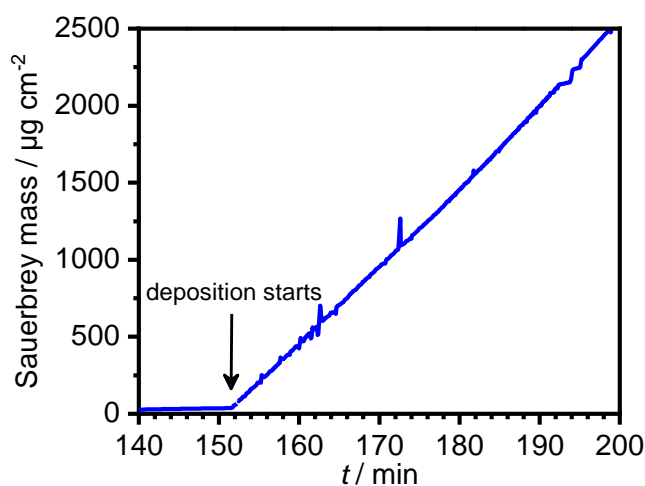

*Fig. S1. Sauerbrey mass recorded during the deposition of pure H<sub>2</sub>O at an H<sub>2</sub>O inlet pressure of 0.100 mbar.*

In the next step, the QCM response was recorded as C<sub>60</sub> sublimed onto the deposition plate. For this, the temperature of the deposition source was set to a range of different temperatures. Once a specific temperature was reached, the pneumatic shutter above the crucible was lifted, allowing the C<sub>60</sub> to be deposited onto the deposition plate. The shutter was then closed, and the temperature increased to the next desired temperature, as shown in Fig. S2(a). The deposition rate was then calculated by determining the gradients from the QCM data. In Fig. S2(b), the deposition rate of C<sub>60</sub> is plotted against the temperature of the deposition source.

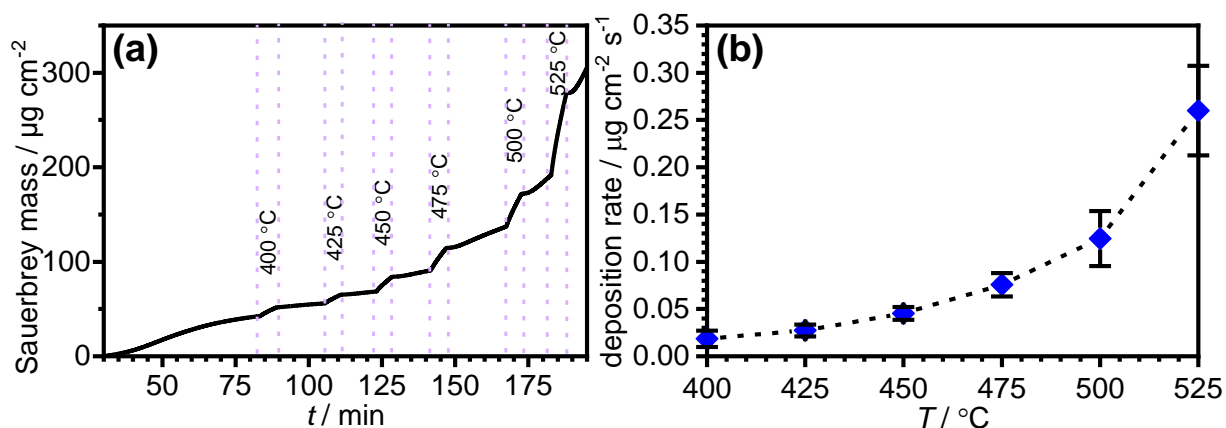

Fig. S2. (a) QCM response during a typical  $\text{C}_{60}$  calibration experiment. (b) The average mass deposition rate of  $\text{C}_{60}$  against the corresponding deposition source temperature.

The mass deposition rates of  $\text{C}_{60}$  at different deposition source temperatures were divided by the molar mass of  $\text{C}_{60}$  ( $720.66 \text{ g mol}^{-1}$ ) to obtain molar deposition rates as shown in Table S1.

Table S1: Average mass and molar deposition rates as well as  $\text{H}_2\text{O}:\text{C}_{60}$  molar ratios for each temperature of the deposition source and a water deposition rate of  $4.75 \times 10^{-2} \mu\text{mol cm}^{-2} \text{s}^{-1}$ .

| $T / ^\circ\text{C}$ | average $\text{C}_{60}$ deposition rate / $\mu\text{g cm}^{-2} \text{s}^{-1}$ | average $\text{C}_{60}$ molar deposition rate / $\mu\text{mol cm}^{-2} \text{s}^{-1}$ | $\text{H}_2\text{O}:\text{C}_{60}$ molar ratio |
|----------------------|-------------------------------------------------------------------------------|---------------------------------------------------------------------------------------|------------------------------------------------|
| 400                  | $1.86 \times 10^{-2}$                                                         | $2.58 \times 10^{-5}$                                                                 | 1841:1                                         |
| 425                  | $2.73 \times 10^{-2}$                                                         | $3.79 \times 10^{-5}$                                                                 | 1254:1                                         |
| 450                  | $4.54 \times 10^{-2}$                                                         | $6.31 \times 10^{-5}$                                                                 | 754:1                                          |
| 475                  | $7.57 \times 10^{-2}$                                                         | $1.05 \times 10^{-4}$                                                                 | 452:1                                          |
| 500                  | $1.25 \times 10^{-1}$                                                         | $1.74 \times 10^{-4}$                                                                 | 274:1                                          |
| 525                  | $2.60 \times 10^{-1}$                                                         | $3.61 \times 10^{-4}$                                                                 | 132:1                                          |

In order to determine the molar ratios of the  $\text{H}_2\text{O}:\text{C}_{60}$  mixtures for a specific deposition source temperature, the molar deposition rate of  $\text{H}_2\text{O}$  was divided by that of  $\text{C}_{60}$ . The ratios and their errors are shown in Fig. S3.

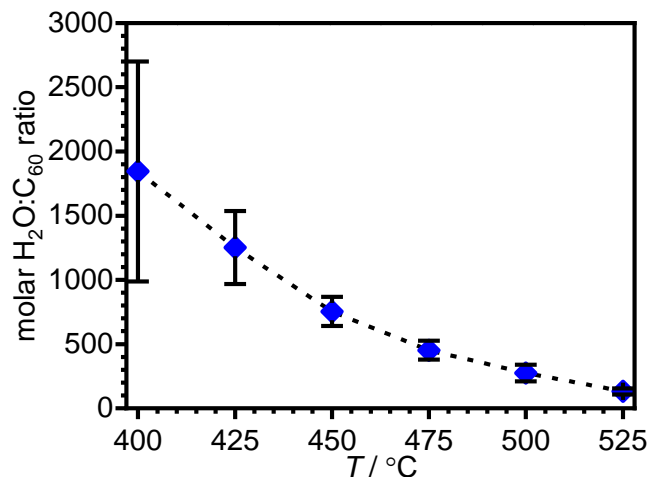

Fig. S3: Molar H<sub>2</sub>O:C<sub>60</sub> ratios as a function of the temperature of the deposition source and a water deposition rate of  $4.75 \times 10^{-2} \mu\text{mol cm}^{-2} \text{s}^{-1}$ . The relatively large error bar at 400°C is due to the low sublimation rate of C<sub>60</sub>.

To realise a range of molar H<sub>2</sub>O:C<sub>60</sub> ratios and considering the errors, the chosen ratios were 1254:1 (source  $T = 425^\circ\text{C}$ ), 452:1 ( $T = 475^\circ\text{C}$ ) and 132:1 ( $T = 525^\circ\text{C}$ ).

## 1.2 Varying the H<sub>2</sub>O flow with constant amounts of C<sub>60</sub>

In section 1.1, the H<sub>2</sub>O inlet pressure was set to  $1.00 \times 10^{-1}$  mbar, which resulted in a deposition rate of  $0.85 \mu\text{g cm}^{-2} \text{s}^{-1}$ . To extend the composition range towards more C<sub>60</sub>-rich mixtures, the H<sub>2</sub>O inlet pressure was reduced in the following while the deposition source was maintained at 525°C.

The first step for calculating the ratios was to determine the deposition rates of H<sub>2</sub>O for inlet pressures of  $5.00 \times 10^{-3}$  mbar,  $2.00 \times 10^{-2}$  and  $5.00 \times 10^{-2}$ , using the QCM as shown in Fig S4.

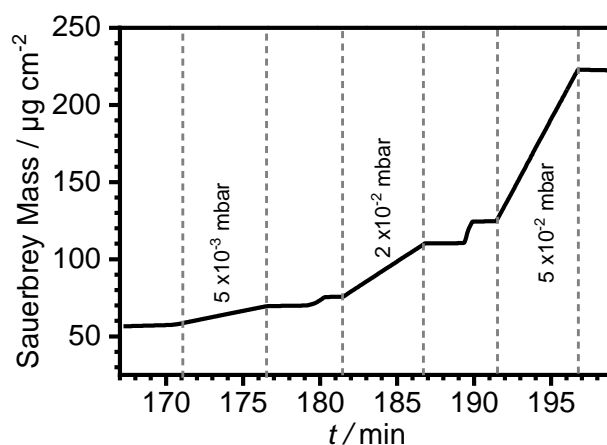

Fig. S4: QCM response during the H<sub>2</sub>O calibration experiment by varying the inlet pressure.

As shown in Table S2, the deposition rates were divided by the molar mass of H<sub>2</sub>O to obtain molar deposition rates.

*Table S2: H<sub>2</sub>O inlet pressures with their corresponding mass and molar deposition rates as well as H<sub>2</sub>O:C<sub>60</sub> molar ratios with  $3.61 \times 10^{-4} \mu\text{mol cm}^{-2} \text{s}^{-1} \text{C}_{60}$ .*

| inlet pressure / mbar | deposition rate / $\mu\text{g cm}^{-2} \text{s}^{-1}$ | molar deposition rate / $\mu\text{mol cm}^{-2} \text{s}^{-1}$ | H <sub>2</sub> O:C <sub>60</sub> molar ratio |
|-----------------------|-------------------------------------------------------|---------------------------------------------------------------|----------------------------------------------|
| $5.00 \times 10^{-2}$ | 0.31                                                  | $1.72 \times 10^{-2}$                                         | 48:1                                         |
| $2.00 \times 10^{-2}$ | 0.11                                                  | $6.02 \times 10^{-3}$                                         | 17:1                                         |
| $5.00 \times 10^{-3}$ | 0.03                                                  | $1.87 \times 10^{-3}$                                         | 5:1                                          |

The molar deposition rate values were then divided by the deposition rate of C<sub>60</sub> at 525°C ( $3.61 \times 10^{-4} \mu\text{mol cm}^{-2} \text{s}^{-1}$ ) to determine the H<sub>2</sub>O:C<sub>60</sub> ratio of mixtures at the different H<sub>2</sub>O inlet pressures as shown in Fig. S5.

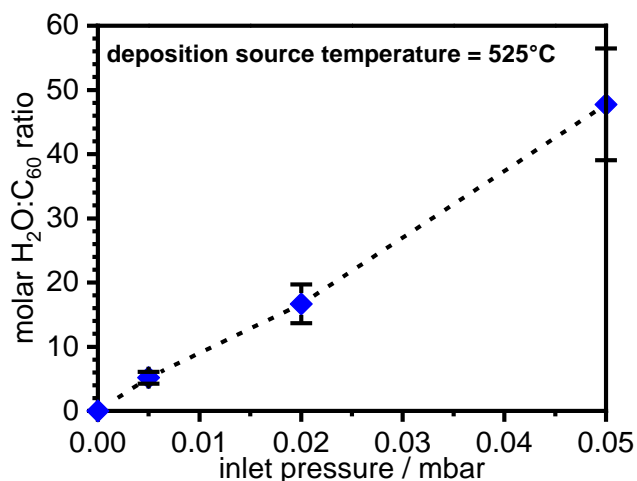

*Fig. S5: Molar H<sub>2</sub>O:C<sub>60</sub> ratios at a constant deposition source temperature of 525 °C and varying the H<sub>2</sub>O inlet pressures.*

### 1.3 Molecular-volume percentages of C<sub>60</sub> in C<sub>60</sub> / H<sub>2</sub>O mixtures

First, the molar volume of low-density amorphous ice (LDA) was calculated. The density of LDA is known to be 0.93 g cm<sup>-3</sup>, therefore the density can be divided by the molar mass of H<sub>2</sub>O to give a molar volume of 5.16×10<sup>-2</sup> mol cm<sup>-3</sup>. The molecular volume was calculated as 3.21×10<sup>-23</sup> cm<sup>3</sup> or 32.18 Å<sup>3</sup>.

The second step was to determine the molar density of C<sub>60</sub> at cryogenic temperatures. From the cubic lattice constant  $a = 14.05$  Å at 80 K, the density of C<sub>60</sub> was calculated to be 1.74 g cm<sup>-3</sup>.<sup>1-2</sup> The molecular volume of C<sub>60</sub> was therefore determined to be 687.77 Å<sup>3</sup>.

In Table S3, the molecular volumes of LDA and C<sub>60</sub> were used to work out the molecular volume percentages of C<sub>60</sub> for the various mixtures. These calculations assume a zero excess volume.

*Table S3: C<sub>60</sub>:H<sub>2</sub>O molar ratios with their corresponding C<sub>60</sub> molecular-volume percentages.*

| $T / ^\circ\text{C}$ | C <sub>60</sub> :H <sub>2</sub> O molar ratios | C <sub>60</sub> volume percent / % |
|----------------------|------------------------------------------------|------------------------------------|
| 425                  | 1:1254                                         | 1.7                                |
| 475                  | 1:452                                          | 4.5                                |
| 525                  | 1:132                                          | 14                                 |
| 525                  | 1:48                                           | 31                                 |
| 525                  | 1:17                                           | 56                                 |
| 525                  | 1:5                                            | 81                                 |

## 2. Additional X-ray diffraction patterns

### 2.1 Comparison with the XRD pattern of bulk $C_{60}$

The XRD patterns of bulk  $C_{60}$  at room temperature and the most  $C_{60}$ -rich sample (1:17) at  $-3^{\circ}\text{C}$  are shown in Figure S6. The pattern of bulk  $C_{60}$  agrees well with those reported in the literature.<sup>1</sup>

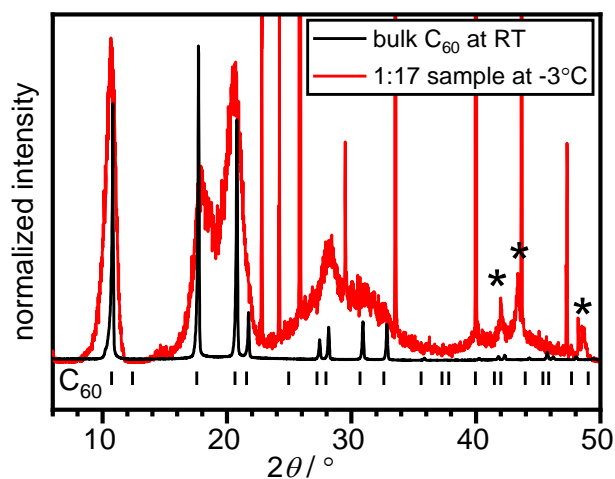

Fig. S6: Comparison of the XRD patterns of bulk  $C_{60}$  at room temperature and the most  $C_{60}$ -rich sample (1:17) at  $-3^{\circ}\text{C}$  ( $\lambda = 1.54 \text{ \AA}$ ). The sharp Bragg peaks of the 1:17 sample arise from ice Ih. Features marked with asterisks originate from the sample holder.

## 2.2 X-ray diffraction patterns of C<sub>60</sub> / H<sub>2</sub>O mixtures heated from 95 K to 270 K

Complete set of XRD artificial heat maps of the pure H<sub>2</sub>O and the C<sub>60</sub>/H<sub>2</sub>O mixtures ranging from 1.67 - 56.03 v% C<sub>60</sub> is shown in Fig. S7. XRD data of the 80.44 v% C<sub>60</sub> sample could not be collected due to the finely powdered nature of the sample.

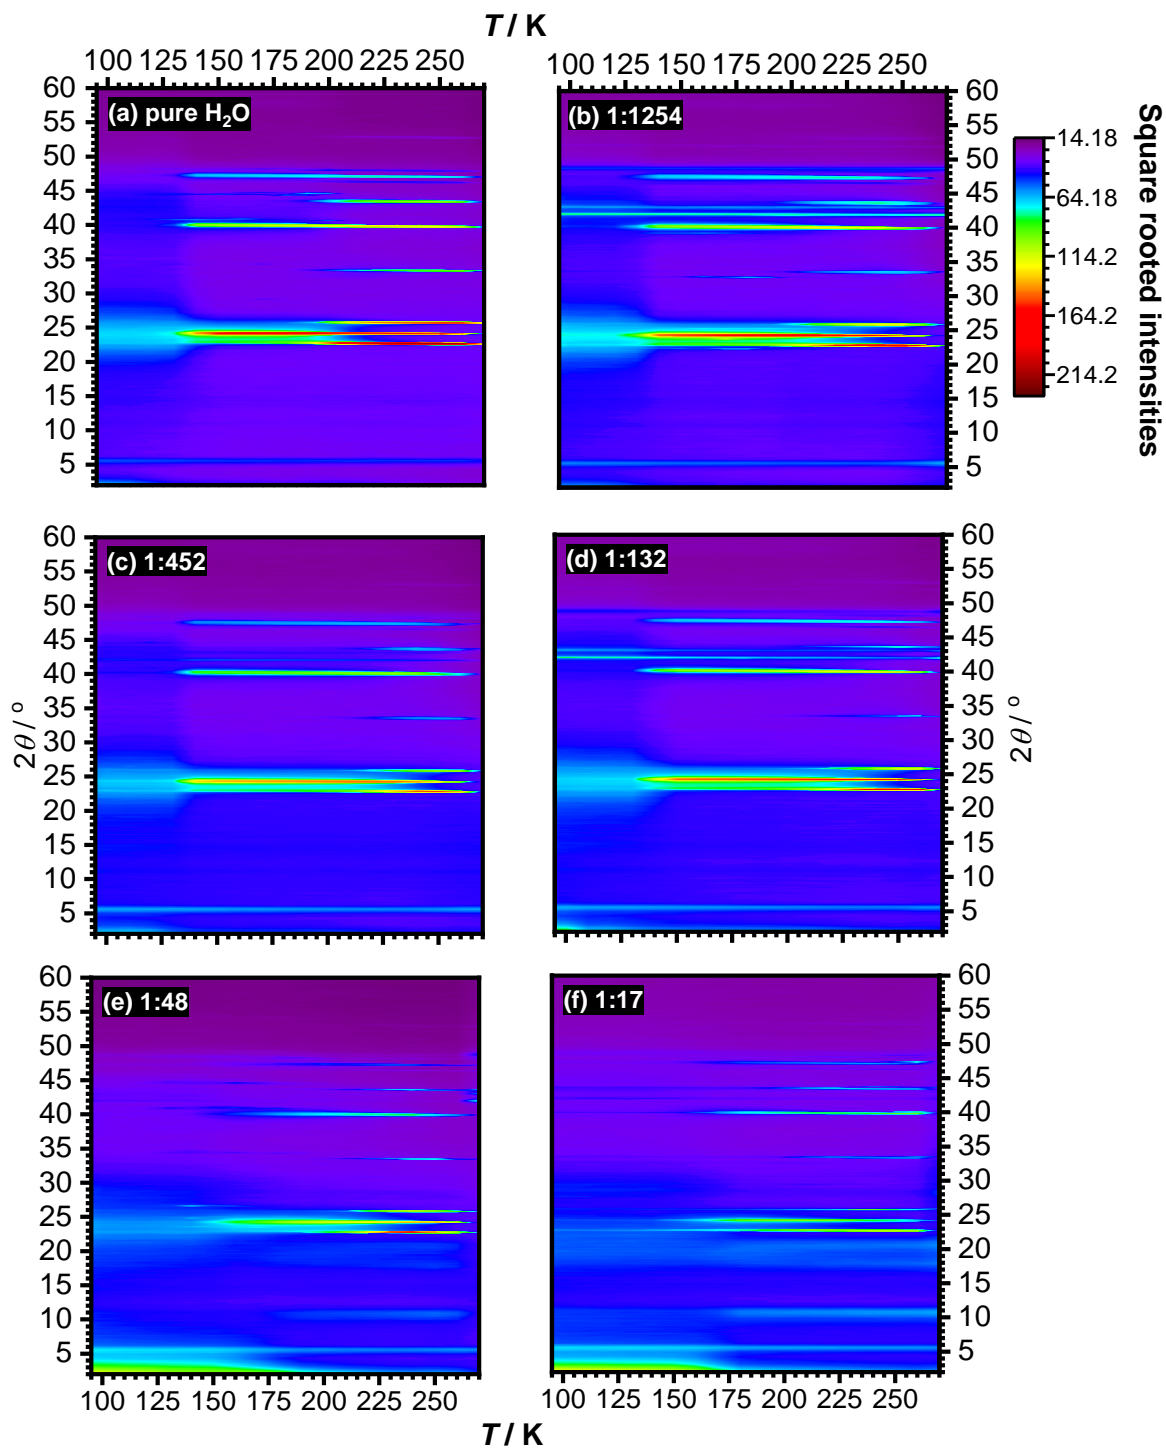

Fig. S7. Contour plots of X-ray diffraction patterns ( $\lambda = 1.54 \text{ \AA}$ ) recorded upon heating at ambient pressure of pure H<sub>2</sub>O and C<sub>60</sub>:H<sub>2</sub>O mixtures with the indicated molar ratios.



## 2.3 MCDIFFaX fits of the 150 K diffraction patterns

Detailed background information on stacking disorder in ice and the MCDIFFaX approach are given in refs 3-5.

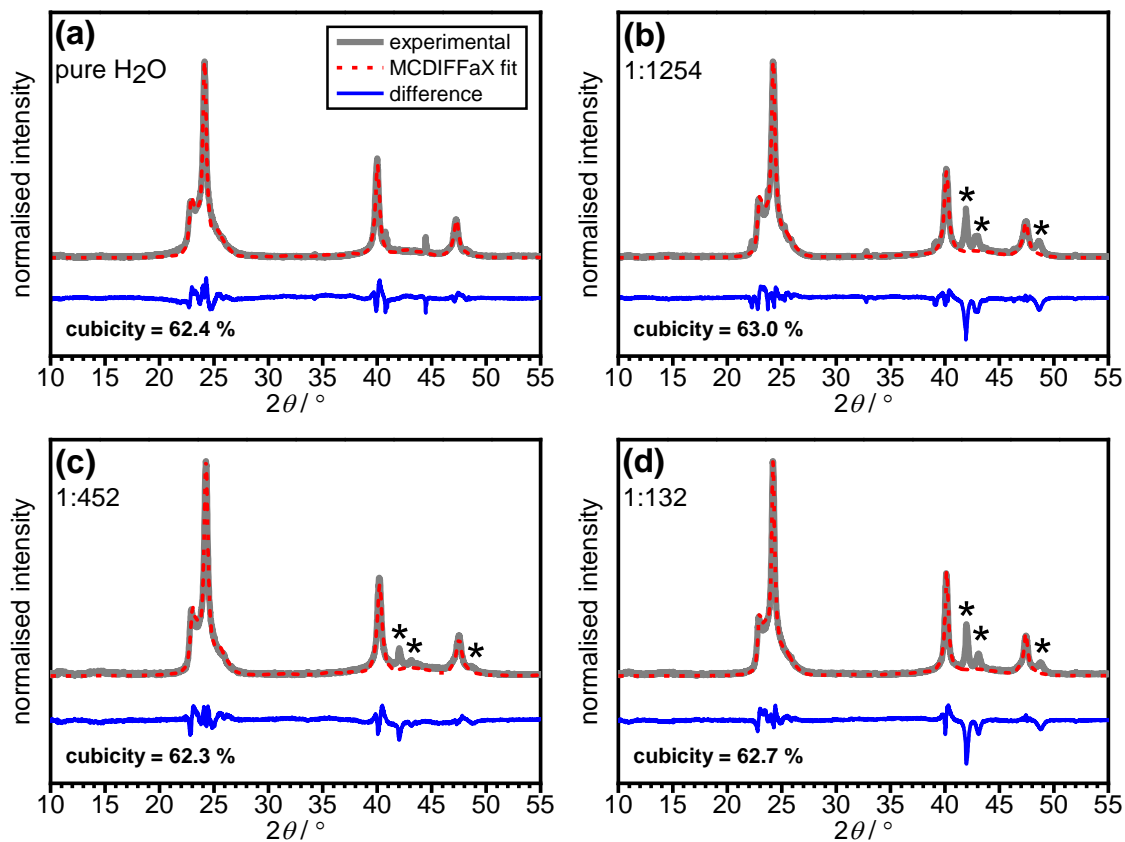

Fig. S8. MCDIFFaX fits of the XRD patterns ( $\text{Cu K}\alpha$ ) of ice Isd obtained after crystallizing (a) pure ASW and (b-c)  $\text{C}_{60}/\text{H}_2\text{O}$  mixtures at 150 K with the indicated  $\text{C}_{60}:\text{H}_2\text{O}$  molar ratios. The obtained cubicities are noted for each sample. Features marked with asterisks are due to the brass sample holder.

## 2.4 Intensity of the (110) Bragg peak of ice I as a function of the cubicity

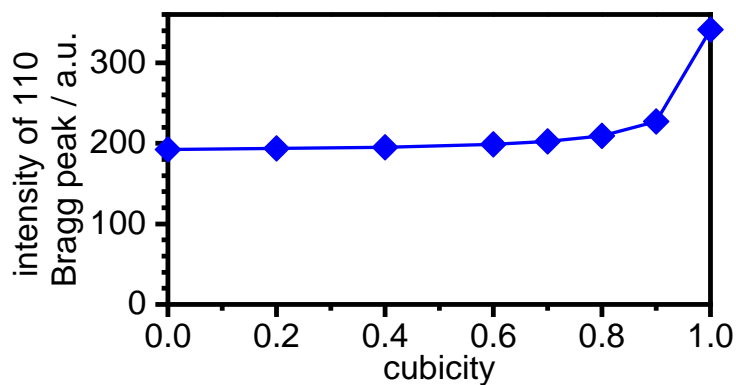

Fig. S9: Intensity of the (110) Bragg peak of ice I calculated with MCDIFFaX as a function of the cubicity.

### 3. SEM picture of a pure C<sub>60</sub> film deposited at 90 K

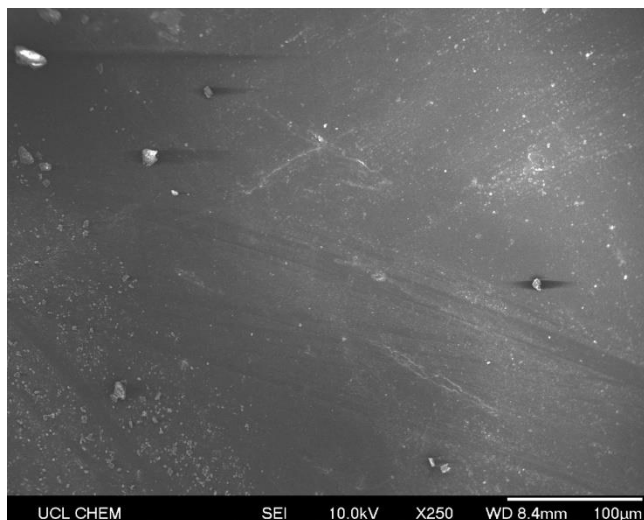

Fig. S10. SEM image of pure C<sub>60</sub> on an aluminium SEM stub at 100 μm magnification.

### 4. References

1. Heiney, P. A.; Fischer, J. E.; McGhie, A. R.; Romanow, W. J.; Denenstein, A. M.; McCauley Jr, J. P.; Smith, A. B.; Cox, D. E., Orientational Ordering Transition in Solid C<sub>60</sub>. *Phys. Rev. Lett.* **1991**, *66*, 2911-2914.
2. David, W. I. F.; Ibberson, R. M.; Dennis, T. J. S.; Hare, J. P.; Prassides, K., Structural Phase Transitions in the Fullerene C<sub>60</sub>. *EPL* **1992**, *18*, 219-225.
3. Malkin, T. L.; Murray, B. J.; Brukhno, A. V.; J., A.; Salzmann, C. G., Structure of Ice Crystallized from Supercooled Water. *Proc. Natl. Acad. Sci. USA* **2012**, *109*, 1041-1045.
4. Malkin, T. L.; Murray, B. J.; Salzmann, C. G.; Molinero, V.; Pickering, S. J.; Whale, T. F., Stacking Disorder in Ice I. *Phys. Chem. Chem. Phys.* **2015**, *17*, 60-76.
5. Salzmann, C. G.; Murray, B. J.; Shephard, J. J., Extent of Stacking Disorder in Diamond. *Diam. Relat. Mater.* **2015**, *59*, 69-72.
